# Supplementary material for: Zinc-Doped Iron Oxide Nanoparticles as a Proton-Activatable Agent for Dose Range Verification in Proton Therapy
Source: MDPI journal article supplement (doi:10.3390/molecules28196874), 2023-09-29
Supplement: s1 [file s1]

## Supplementary Materials

### Zinc-doped iron oxide nanoparticles as a proton-activatable agent for dose range verification in proton therapy

#### 1. IONP@Zn-cit colloidal stability in cell culture medium

| IONP@Zn-cit ( $\mu\text{gZn/mL}$ ) | 20.81   | 41.61                                                                               | 83.22 | 166.44 | 332.88 | 665.75 |
|------------------------------------|---------|-------------------------------------------------------------------------------------|-------|--------|--------|--------|
| SD                                 | 0.84    | 1.68                                                                                | 3.36  | 6.72   | 13.44  | 26.87  |
| Incubation time                    | Medium  |                                                                                     |       |        |        |        |
| 3 hours                            | No FBS  | 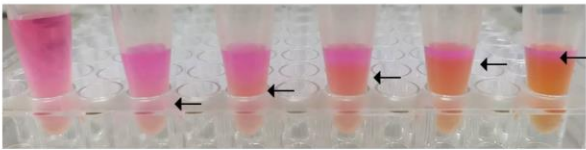   |       |        |        |        |
|                                    | 10% FBS |    |       |        |        |        |
| 7 days                             | No FBS  |   |       |        |        |        |
|                                    | 10% FBS |  |       |        |        |        |

**Figure S1.** Visual follow-up of zinc doped iron oxide nanoparticles capped with citrate (IONP@Zn-cit) in concentrations between  $(20.81 \pm 0.84$  and  $665.75 \pm 26.87 \mu\text{g Zn/ml})$  after 3 hours and 7 days incubations in cell culture medium with and without FBS supplementation. Arrows point phase changes produced by nanoparticle precipitation.

#### 2. Radioactivity profile of $^{67}\text{Ga}$ after $^{67}\text{Ga}$ -IONP@Zn-cit purification

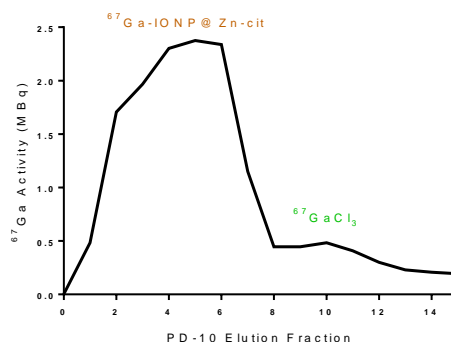

**Figure S2.** Radio-chromatogram of  $^{67}\text{Ga}$ -IONP@Zn-cit purification after microwave synthesis. Activity (in MBq) present in the fractions (1-15) obtained after purification of the  $^{67}\text{Ga}$ -IONP@Zn-cit synthesis mixture by gel filtration with PD-10 columns (Sephadex G-25M). The first peak corresponds to purified  $^{67}\text{Ga}$ -IONP@Zn-cit and the second one to free gallium-67 in chloride form.

### 3. Biodistribution and pharmacokinetic studies of $^{67}\text{Ga}$ -IONP@Zn-cit

**Table S1.**  $^{67}\text{Ga}$ -IONP@Zn-cit biodistribution values of different tissues after each time point (6 hours, 1, 3, and 7 days), calculated as percentage of injected dose per gram of tissue (%ID/g) with the standard deviation (SD) between animals.

| Time               | 6h     |       | 1d     |       | 3d     |       | 7d     |       |
|--------------------|--------|-------|--------|-------|--------|-------|--------|-------|
| Tissues            | %ID/g  | SD    | %ID/g  | SD    | %ID/g  | SD    | %ID/g  | SD    |
| <b>Total Blood</b> | 4.382  | 1.061 | 0.389  | 0.051 | 0.187  | 0.024 | 0.126  | 0.025 |
| <b>Plasma</b>      | 7.642  | 2.123 | 0.646  | 0.087 | 0.320  | 0.036 | 0.208  | 0.037 |
| <b>Heart</b>       | 1.441  | 0.352 | 1.118  | 0.520 | 0.558  | 0.069 | 0.410  | 0.137 |
| <b>Lungs</b>       | 2.244  | 0.331 | 1.505  | 0.408 | 0.945  | 0.288 | 0.605  | 0.143 |
| <b>Liver</b>       | 26.983 | 9.220 | 33.718 | 1.616 | 26.692 | 1.133 | 17.934 | 4.664 |
| <b>Spleen</b>      | 17.346 | 5.581 | 32.238 | 2.050 | 28.915 | 4.266 | 16.958 | 2.616 |
| <b>Stomach</b>     | 1.016  | 0.377 | 2.426  | 1.942 | 1.786  | 0.711 | 0.759  | 0.494 |
| <b>Pancreas</b>    | 0.747  | 0.121 | 0.588  | 0.421 | 0.978  | 0.425 | 0.728  | 0.020 |
| <b>Guts</b>        | 1.528  | 0.372 | 1.925  | 0.557 | 1.410  | 0.194 | 0.781  | 0.167 |
| <b>Kidneys</b>     | 2.249  | 0.673 | 1.977  | 0.103 | 1.511  | 0.076 | 1.076  | 0.195 |
| <b>Brain</b>       | 0.116  | 0.010 | 0.062  | 0.026 | 0.050  | 0.023 | 0.036  | 0.009 |
| <b>Bone</b>        | 2.989  | 0.620 | 4.412  | 0.072 | 2.997  | 2.171 | 1.849  | 0.803 |
| <b>Tumor</b>       | 0.793  | 0.126 | 0.951  | 0.080 | 0.921  | 0.168 | 0.613  | 0.024 |

**Table S2.** Accumulation of radioactivity (in %ID/g, expressed as mean $\pm$ SD) and calculated  $^{67}\text{Ga}$ -IONP@Zn-cit (in  $\mu\text{g}$  Zn or Fe per gram) in tumor tissues after times (0.25, 1, 3 and 7 days) post probe administration ( $^{67}\text{Ga}$ -IONP@Zn-cit containing 158  $\mu\text{g}$  Zn and 103.5  $\mu\text{g}$  Fe).

| Time (days) | Tumor Accumulation | $^{67}\text{Ga}$ -IONP@Zn-cit Concentration |                    |
|-------------|--------------------|---------------------------------------------|--------------------|
|             | %ID/g              | $\mu\text{g}$ Zn/g                          | $\mu\text{g}$ Fe/g |
| 0.25        | 0.79 $\pm$ 0.13    | 1.26                                        | 0.82               |
| 1           | 0.95 $\pm$ 0.08    | 1.51                                        | 0.98               |
| 3           | 0.92 $\pm$ 0.17    | 1.46                                        | 0.95               |
| 7           | 0.61 $\pm$ 0.02    | 0.97                                        | 0.63               |

#### 4. X-ray Irradiation

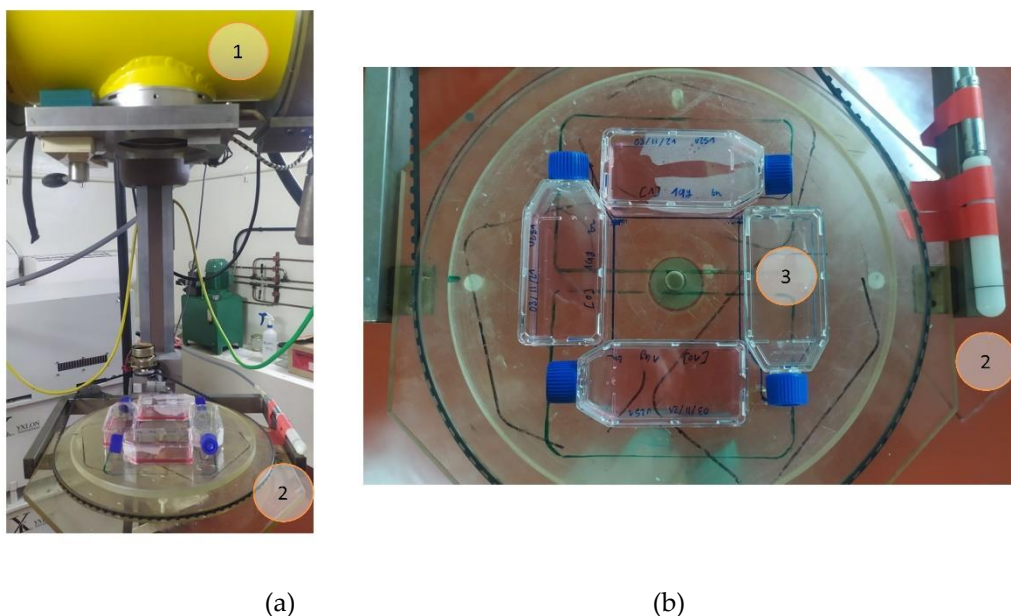

**Figure S3.** (a) General view of the irradiation system with the X-ray tube (1). An ionizing chamber (2) was used for dose irradiation control measurements. (b) Top view of the position of four 25 cm<sup>2</sup> Flask bottles (3) to perform clonogenic assays with nanoparticles. The bottles were forming a square at the same distance from the center of the beam to have the same irradiation dose for all cells seeded.

#### 5. Proton Irradiation

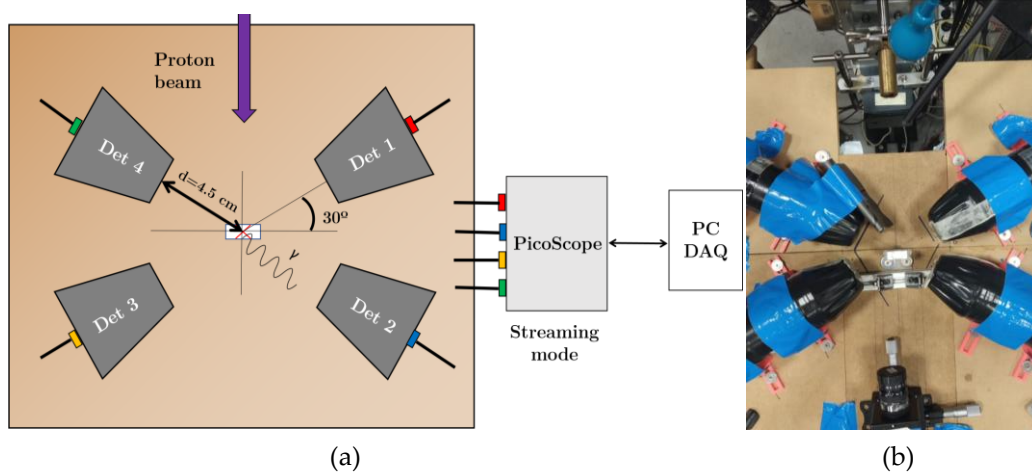

**Figure S4.** (a) Scheme of the general view of the irradiation system with the proton beam and the four LaBr<sub>3</sub>(Ce)-based detectors. (b) Top view of the real position of a sample in front of the beam and between the detectors.
